# Supplementary material for: Effect of a Positive Psychological Intervention on Pain and Functional Difficulty Among Adults With Osteoarthritis: A Randomized Clinical Trial
Source: PubMed Central journal article supplement (PMC6324470; doi:10.1001/jamanetworkopen.2018.2533), 2018-09-21
Supplement: jamanetwopen-1-e182533-s002.pdf [file jamanetwopen-1-e182533-s002.pdf]

## Supplementary Online Content

Hausmann LRM, Youk A, Kwok CK, et al. Effect of a positive psychological intervention on pain and functional difficulty among adults with osteoarthritis: a randomized clinical trial. *JAMA Netw Open*. 2018;1(5):e182533.  
doi:10.1001/jamanetworkopen.2018.2533

**eTable 1.** Reasons for Ineligibility

**eTable 2.** Reasons for Missing Data Points

**eTable 3.** Reasons for Withdrawing From the Study

**eTable 4.** Adherence to Positive and Control Programs by Race

**eTable 5.** Ratings of Positive and Control Programs by Race

This supplementary material has been provided by the authors to give readers additional information about their work.

**eTable 1.** Reasons for Ineligibility

| <b>Reasons</b>                                                                                                        | <b>No. (of 351)*</b> |
|-----------------------------------------------------------------------------------------------------------------------|----------------------|
| Under 50 years old                                                                                                    | 2                    |
| Does not receive primary care at study site                                                                           | 30                   |
| Race other than non-Hispanic white or African American                                                                | 29                   |
| Infrequent knee pain                                                                                                  | 83                   |
| Pain rating < 4 on 0-10 scale                                                                                         | 77                   |
| Self-reported serious problems with hearing or eyesight                                                               | 15                   |
| Diagnosed with any type of arthritis other than OA or degenerative arthritis                                          | 77                   |
| Treated for cancer in the last three years                                                                            | 73                   |
| Had a steroid injection into one or both knees in the past 3 months                                                   | 50                   |
| Had a knee replacement into one or both knees in the past 3 months                                                    | 3                    |
| Plan to have a knee replacement in one or both knees in the next 6 months                                             | 15                   |
| Self-reported inability to complete the study telephone calls and program activities that involve reading and writing | 15                   |
| Lack of a reliable telephone number                                                                                   | 3                    |
| Answering 2 or more items incorrectly on a 6-item screener for cognitive impairment                                   | 36                   |
| Deemed unable to participate by interviewer**                                                                         | 4                    |

\*Numbers will not add to 351 because individuals could be ineligible for multiple reasons.

\*\*Scheduled for shot (n=1), knee pain due to an accident (n=1), difficulty completing screening survey (n=2)

**eTable 2.** Reasons for Missing Data Points

| Time Point        | Reasons    | White   |          | African American |          |
|-------------------|------------|---------|----------|------------------|----------|
|                   |            | Control | Positive | Control          | Positive |
| Week 1            | No answer  | 5       | 3        | 4                | 3        |
|                   | Refused    | 2       | 3        | 3                | 6        |
|                   | Withdrawn* | 0       | 0        | 1                | 1        |
|                   | Other      | 1       | 0        | 0                | 0        |
| Week 2            | No answer  | 8       | 2        | 5                | 7        |
|                   | Refused    | 2       | 7        | 6                | 7        |
|                   | Withdrawn* | 1       | 1        | 1                | 2        |
|                   | Other      | 2       | 0        | 0                | 0        |
| Week 3            | No answer  | 5       | 4        | 11               | 9        |
|                   | Refused    | 2       | 4        | 4                | 11       |
|                   | Withdrawn* | 2       | 2        | 1                | 2        |
|                   | Other      | 1       | 0        | 0                | 0        |
| Week 4            | No answer  | 5       | 5        | 9                | 7        |
|                   | Refused    | 6       | 8        | 4                | 12       |
|                   | Withdrawn* | 2       | 2        | 2                | 3        |
|                   | Other      | 1       | 0        | 0                | 0        |
| Week 5            | No answer  | 9       | 6        | 6                | 9        |
|                   | Refused    | 2       | 8        | 5                | 9        |
|                   | Withdrawn* | 2       | 2        | 2                | 3        |
|                   | Other      | 0       | 0        | 0                | 0        |
| Week 6            | No answer  | 6       | 7        | 7                | 4        |
|                   | Refused    | 3       | 4        | 3                | 8        |
|                   | Withdrawn* | 2       | 2        | 2                | 3        |
|                   | Other      | 0       | 1        | 0                | 0        |
| 1-month follow-up | No answer  | 7       | 1        | 7                | 4        |
|                   | Refused    | 5       | 4        | 5                | 7        |
|                   | Withdrawn* | 3       | 3        | 2                | 4        |
|                   | Other      | 1       | 0        | 0                | 1        |
| 3-month follow-up | No answer  | 3       | 3        | 7                | 6        |
|                   | Refused    | 4       | 4        | 7                | 3        |
|                   | Withdrawn* | 3       | 4        | 2                | 4        |
|                   | Other      | 0       | 0        | 0                | 1        |
| 6-month follow-up | No answer  | 3       | 3        | 8                | 3        |
|                   | Refused    | 1       | 4        | 8                | 5        |
|                   | Withdrawn* | 3       | 4        | 2                | 4        |
|                   | Other      | 0       | 0        | 1                | 1        |

\*See eTable 3 for reasons for withdrawing from the study.

**eTable 3.** Reasons for Withdrawing From the Study

|                                     | <b>White</b>   |                 | <b>African American</b> |                 |
|-------------------------------------|----------------|-----------------|-------------------------|-----------------|
|                                     | <b>Control</b> | <b>Positive</b> | <b>Control</b>          | <b>Positive</b> |
| Total number withdrawn              | 3              | 4               | 2                       | 4               |
| Reasons for withdrawing*            |                |                 |                         |                 |
| Did not think activities would help | 1              | 2               | 2                       | 3               |
| Too busy                            | 1              | 1               | 1                       | 1               |
| Activities too difficult            | 0              | 0               | 0                       | 1               |
| Inadequate payments                 | 0              | 0               | 0                       | 1               |
| Unrelated health problems           | 1              | 0               | 0                       | 0               |
| No reason given                     | 0              | 1               | 0                       | 1               |

\*Participants could withdraw for multiple reasons.

**eTable 4.** Adherence to Positive and Control Programs by Race

| Adherence, n (%)*                                          | Total<br>(n=360) | Treatment Group     |                    |                             | Participant Race |                                |                             |
|------------------------------------------------------------|------------------|---------------------|--------------------|-----------------------------|------------------|--------------------------------|-----------------------------|
|                                                            |                  | Positive<br>(n=180) | Control<br>(n=180) | Test Statistic              | White<br>(n=180) | African<br>American<br>(n=180) | Test Statistic              |
| Completed at least 5 of 6 calls                            | 287 (79.7)       | 142 (78.9)          | 145 (80.6)         | $\chi^2(1)=0.16,$<br>p=0.69 | 146 (81.1)       | 141 (78.3)                     | $\chi^2(1)=0.44,$<br>p=0.51 |
| Entirely or partially completed at least 5 of 6 activities | 234 (65.0)       | 121 (67.2)          | 113 (62.8)         | $\chi^2(1)=.79,$<br>p=0.37  | 126 (70.0)       | 108 (60.0)                     | $\chi^2(1)=4.00,$<br>p=0.05 |

\*Participants who did not complete a weekly call were counted as not completing that week's activity. P-values comparing adherence rates are from logistic regression models. Positive vs. neutral and White vs. African American p-values are from main effect models that include study site. There were no significant Treatment Group by Race interactions (data not shown). See eTable 2 for weekly adherence rates.

**eTable 5.** Ratings to Positive and Control Programs by Race

| Ratings of Completed Weekly Activities, mean (SD)* | Total (n=1620) | Treatment Group  |                 |                                | Participant Race |                          |                              |
|----------------------------------------------------|----------------|------------------|-----------------|--------------------------------|------------------|--------------------------|------------------------------|
|                                                    |                | Positive (n=814) | Control (n=806) | Test Statistic                 | White (n=839)    | African American (n=781) | Test Statistic               |
| Perceived benefit                                  | 5.58 (1.52)    | 5.77 (1.32)      | 5.39 (1.68)     | $\chi^2(1)=10.27$ ,<br>p=0.001 | 5.54 (1.52)      | 5.62 (1.52)              | $\chi^2(1)=0.84$ ,<br>p=0.36 |
| Perceived enjoyment                                | 5.62 (1.55)    | 5.91 (1.30)      | 5.33 (1.72)     | $\chi^2(1)=22.17$ ,<br>p<0.001 | 5.60 (1.53)      | 5.64 (1.57)              | $\chi^2(1)=0.17$ ,<br>p=0.68 |
| Perceived difficulty                               | 2.24 (1.83)    | 2.26 (1.80)      | 2.23 (1.87)     | $\chi^2(1)=0.00$ ,<br>p=0.95   | 2.24 (1.79)      | 2.25 (1.87)              | $\chi^2(1)=0.00$ ,<br>p=0.96 |

\*Activities were rated on 7-point Likert scales (1=not at all to 7=extremely). P-values comparing activity ratings are from mixed-effects linear regression models using maximum likelihood estimation. The analyses included multiple observations per patient, with observation weeks only analyzed for those recalling the correct activity for the week (1620 observation weeks nested within 333 participants). Positive vs. neutral and White vs. African American p-values are from main effect models that included study site. There were no significant Treatment Group by Race interactions (data not shown).
